# Supplementary material for: Evaluation of Earth System Model and Atmospheric Inversion using Total Column CO2 Observations from GOSAT and OCO-2
Source: Research Square preprint supplement (doi:10.21203/rs.3.rs-53348/v3), 2021-01-06
Supplement: Supplementary file 1 [file 43f73e04258c7011de69e1d7.docx]

**Supplementary materials**

**Evaluation of Earth Systems Models and Atmospheric Inversions using Total Column CO2 Observations from GOSAT and OCO-2**

Prabir K. Patra1,2

Corresponding author (Email: prabir@jamstec.go.jp)

**Figure S1:** Same as Figure 5 but for data over land surface only.

**Figure S2:** Same as Figure 5, but for the observations over water bodies only.

**Animation S1:** Same as Figure 6 for the time series of XCO2 for all the 15 land regions and 11 ocean regions for the period of 2009-2018. Note that these plots consist of 2 additional panels showing the model-measurement differences and the detrended seasonal cycles, for which the statistics are presented in Table 1. (https://ebcrpa.jamstec.go.jp/~prabir/data/Pubctn/XCO2model/Animation_S1.gif)

**Animation S2:** Same as Animation S1, but for the OCO-2 measurement period (2014-2018).

(https://ebcrpa.jamstec.go.jp/~prabir/data/Pubctn/XCO2model/Animation_S2.gif)

**Animation S3:** Same as Figure 7 for XCO2 seasonal cycle amplitudes for different years, and those for ACTM_InvF and OCO-2 only for the period 2014 to 2018.

(https://ebcrpa.jamstec.go.jp/~prabir/data/Pubctn/XCO2model/Animation_S3.gif)
